# Supplementary material for: Physical Activity and Risk of Lymphoma: A Meta-Analysis
Source: Oxford University Press journal article supplement (doi:10.1158/1055-9965.epi-13-0182), 2013-05-16
Supplement: 10559965epi130182-sup-fig_2_pdf_47k.pdf [file 10559965epi130182-sup-fig_2_pdf_47k.pdf]

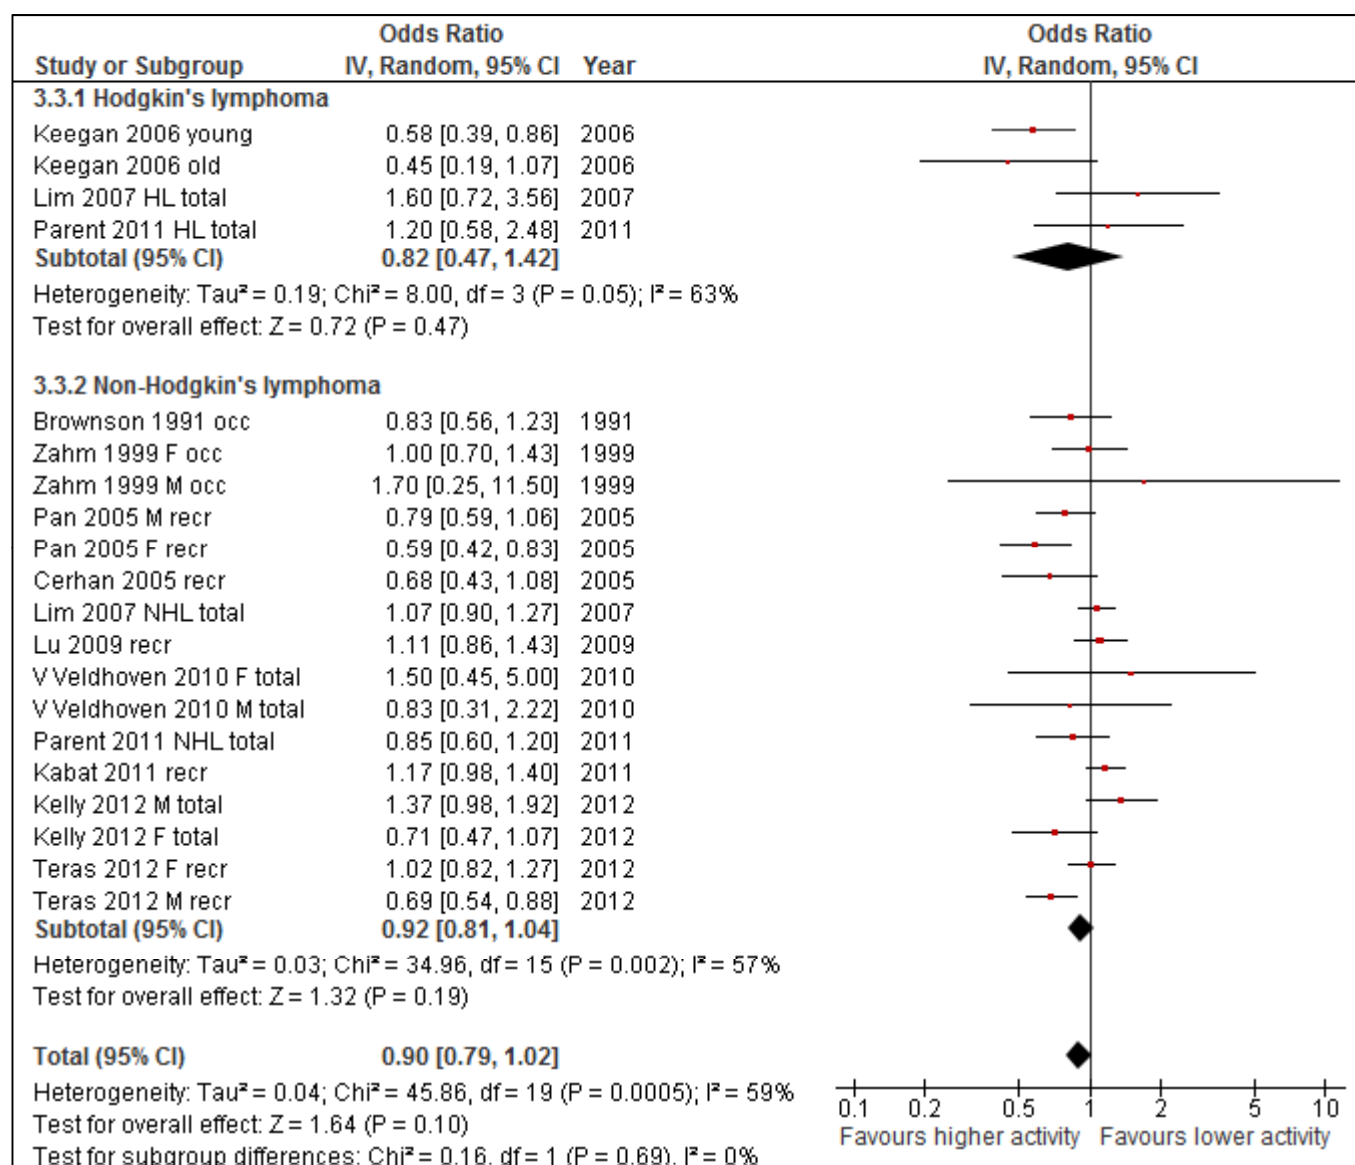

Supplementary Fig. S2: Subgroup analysis for type of lymphoma

F = women, M = men, occ = occupational, recr = recreational
